# Supplementary material for: Potential and limits of OSL, TT-OSL, IRSL and pIRIR 290 dating methods applied on a Middle Pleistocene sediment record of Lake El'gygytgyn, Russia
Source: Copernicus journal article supplement (doi:10.5194/cp-9-719-2013), 2013-03-14
Supplement: Supplementary file 1 [file cp-9-719-2013-supplement.pdf]

## Supplementary Material

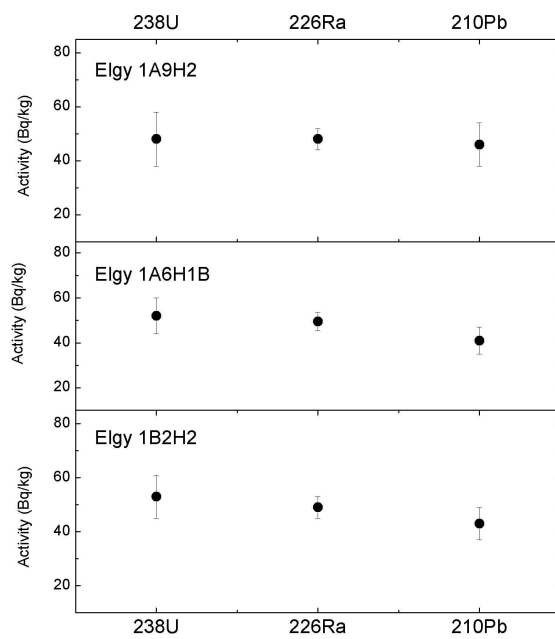

Fig. S1: Activities of the U-series products for the three samples measured at VKTA Rossendorf. If the decay series is in equilibrium the activities of all daughters agree within 2-sigma errors with the activity of the mother. The error bars shown in the graphs represent the 2-sigma errors.

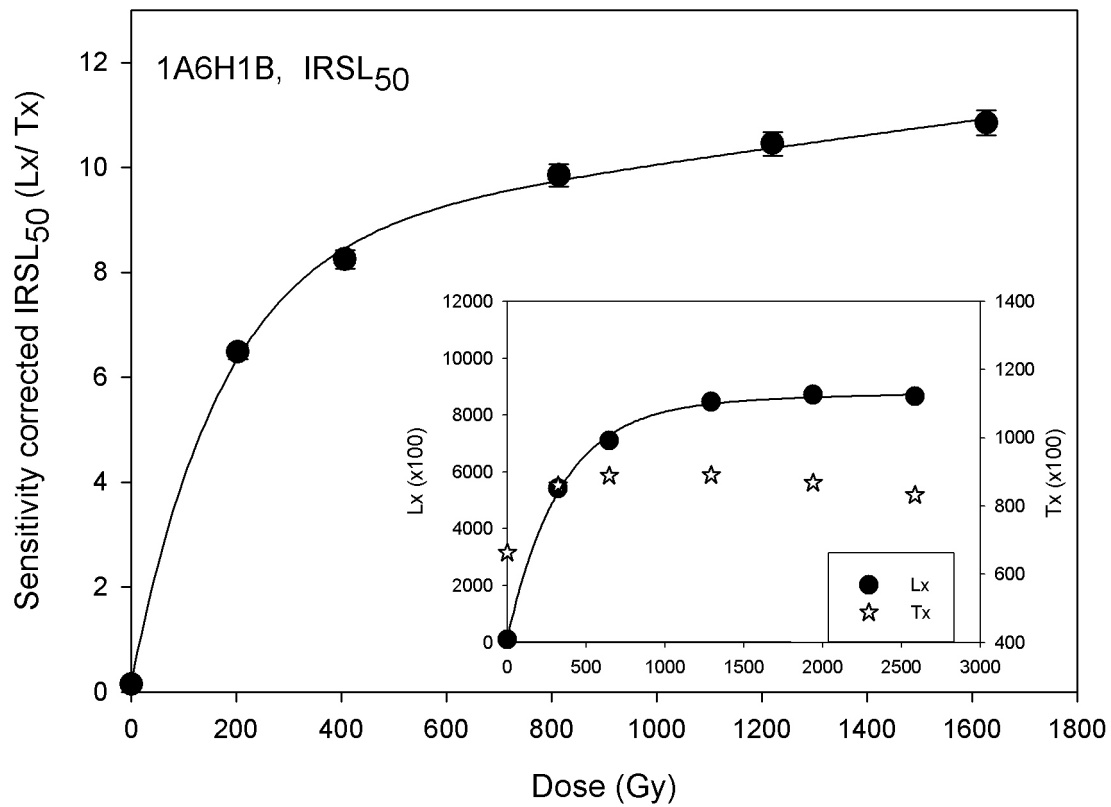

Fig. S2: Dose response curve of sample 1A6H1B fitted to a single exponential plus linear function. The IR<sub>50</sub> protocol was applied with 7 dose steps up to a maximum beta dose of ~ 2500 Gy. The deconvolution (inset) of the dose response curve ( $L_x/T_x$ ) shows a pseudo-increase, i.e the regenerated IRSL<sub>50</sub> signal ( $L_x$ ) is in saturation and the corresponding test dose signal ( $T_x$ ) is decreasing with each regeneration cycle. The test dose was kept constant.

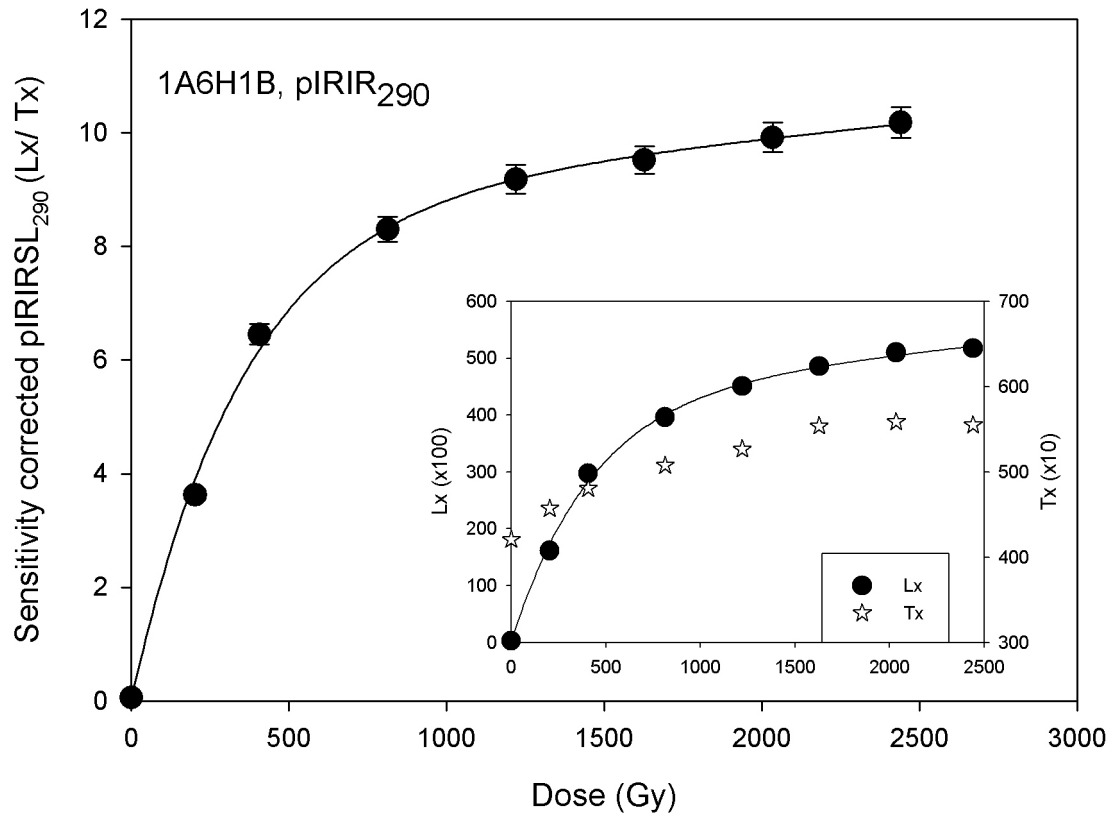

Fig. S3: Saturation dose response curve of sample 1A6H1B fitted to a single exponential plus linear function. The pIRIR<sub>290</sub> protocol was applied with 7 dose steps up to a maximum beta dose of ~ 2500 Gy. The deconvolution (inset) of the dose response curve ( $L_x/T_x$ ) shows a real increase with each regeneration cycle, i.e the regenerated pIRIR<sub>290</sub> signal ( $L_x$ ) and the corresponding test dose signal ( $T_x$ ) are increasing. The test dose was kept constant.

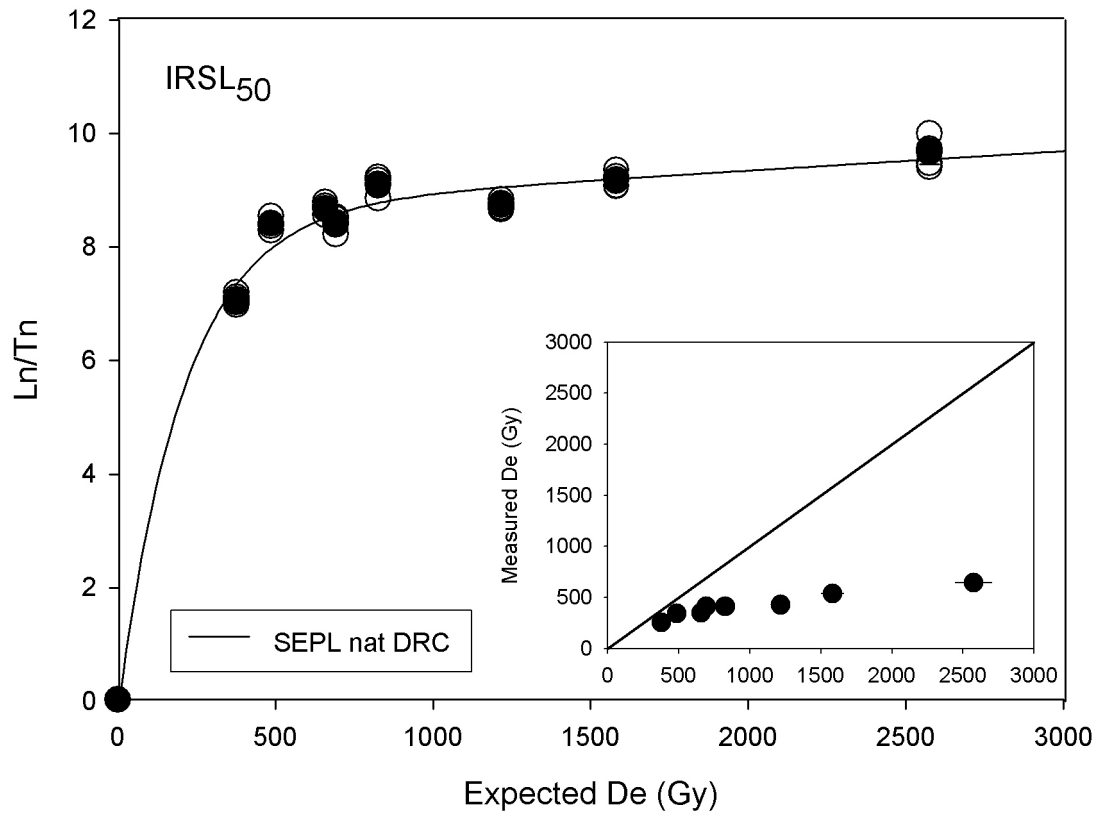

Fig. S4: Test dose normalised natural optically stimulated luminescence signals ( $L_n/T_n$ ) of the eight samples used for the standard SAR-IRSL protocol plotted against their expected equivalent dose values ( $D_e$ ) (see Chapot et al., 2012). The expected  $D_e$  of each sample was calculated by multiplying the environmental dose rate by the expected age. The inset shows the severe divergence between measured and expected  $D_e$ . The solid line is the 1:1 line.

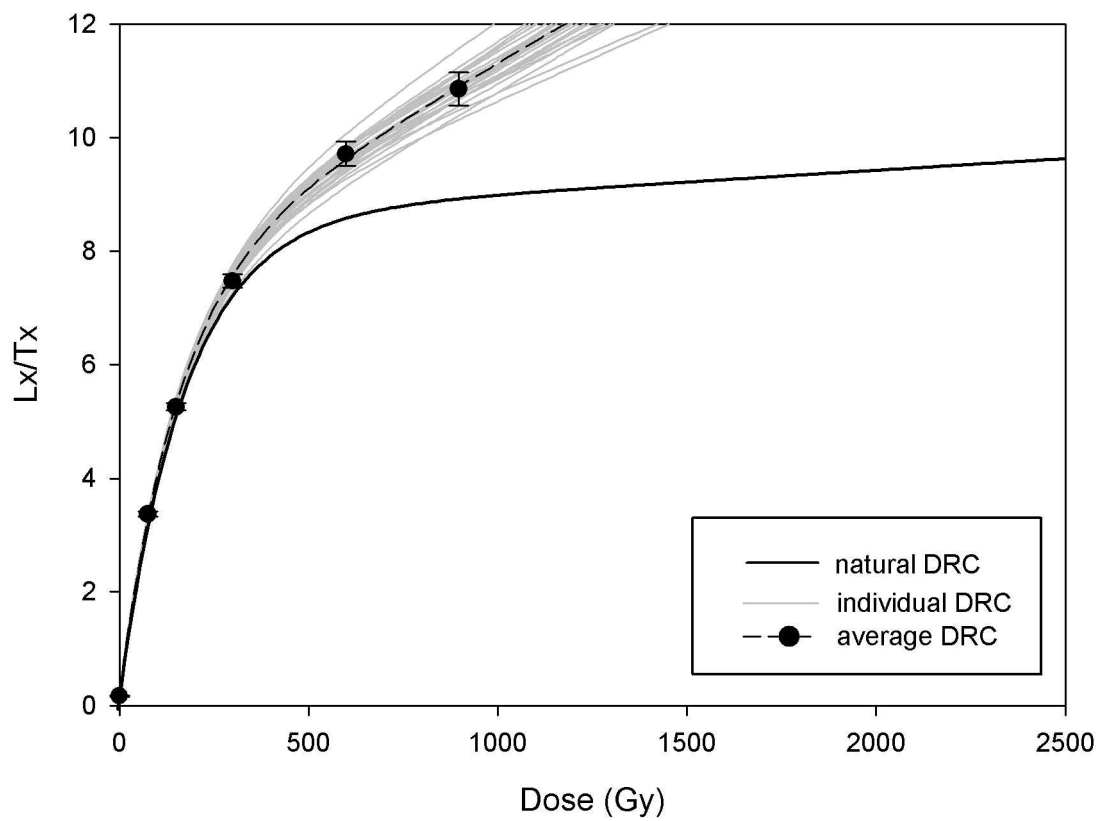

Fig. S5: Comparison of the natural dose response curve (DRC) from Fig. S4 with the single aliquot regenerative DRCs of the aliquots used to construct the natural DRC.
